# Supplementary material for: Hydrothermal Fabrication of Hierarchically Anatase TiO2 Nanowire arrays on FTO Glass for Dye-sensitized Solar Cells
Source: PubMed Central journal article supplement — Sci Rep. 2013 Feb 27;3:1352. doi: 10.1038/srep01352 (PMC3583000; doi:10.1038/srep01352), 2013-02-27
Supplement: srep01352-s1.pdf [file srep01352-s1.pdf]

# Supplementary Information

## Hydrothermal Fabrication of Hierarchically Anatase TiO<sub>2</sub> Nanowire arrays on FTO Glass for Dye-sensitized Solar Cells

Wu-Qiang Wu, Bing-Xin Lei, Hua-Shang Rao, Yang-Fan Xu, Yu-Fen Wang, Cheng-Yong Su, and Dai-Bin Kuang\*

MOE Key Laboratory of Bioinorganic and Synthetic Chemistry, KLGHEI of Environment and Energy Chemistry, State Key Laboratory of Optoelectronic Materials and Technologies, School of Chemistry and Chemical Engineering, Sun Yat-sen University, Guangzhou 510275, P. R. China.

**Email:** [kuangdb@mail.sysu.edu.cn](mailto:kuangdb@mail.sysu.edu.cn).

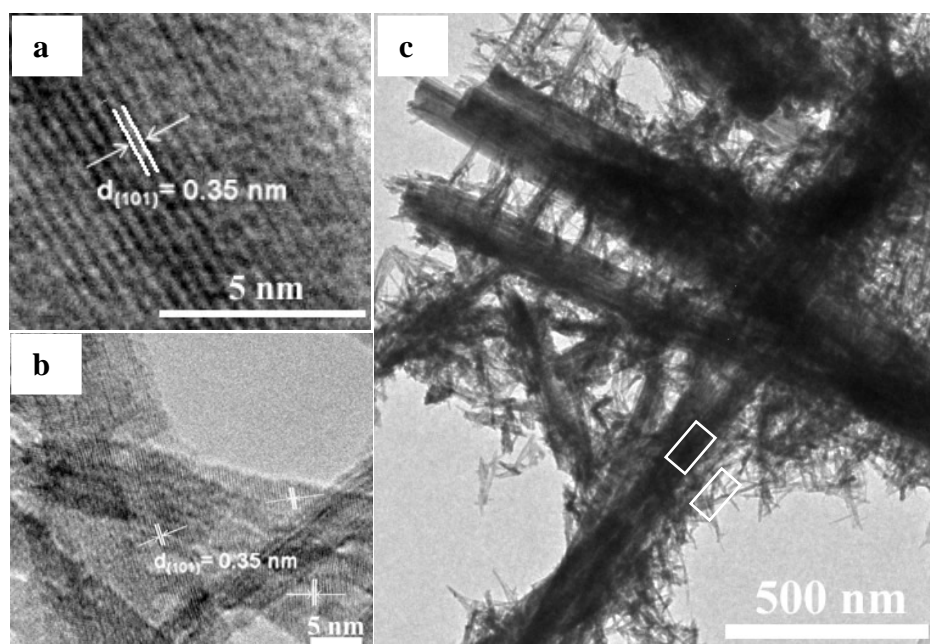

**Supplementary Figure S1. HRTEM images of as-prepared hierarchical anatase TiO<sub>2</sub> nano-architecture arrays prepared by a hydrothermal reaction at 180 °C for 9 h on FTO glass.** The HRTEM images of TiO<sub>2</sub> trunk (a) and branches (b) show the as-prepared samples are single crystalline anatase TiO<sub>2</sub>. (c) Typical TEM images of a pile of as-prepared hierarchical anatase TiO<sub>2</sub> nano-architecture arrays indicate that large amounts of short TiO<sub>2</sub> nanorods branches are grown on the surface of TiO<sub>2</sub> nanowire trunk, which leads to an interesting hierarchical anatase TiO<sub>2</sub> nano-architecture arrays consisting of long TiO<sub>2</sub> nanowire trunk and short TiO<sub>2</sub> nanorod branches.

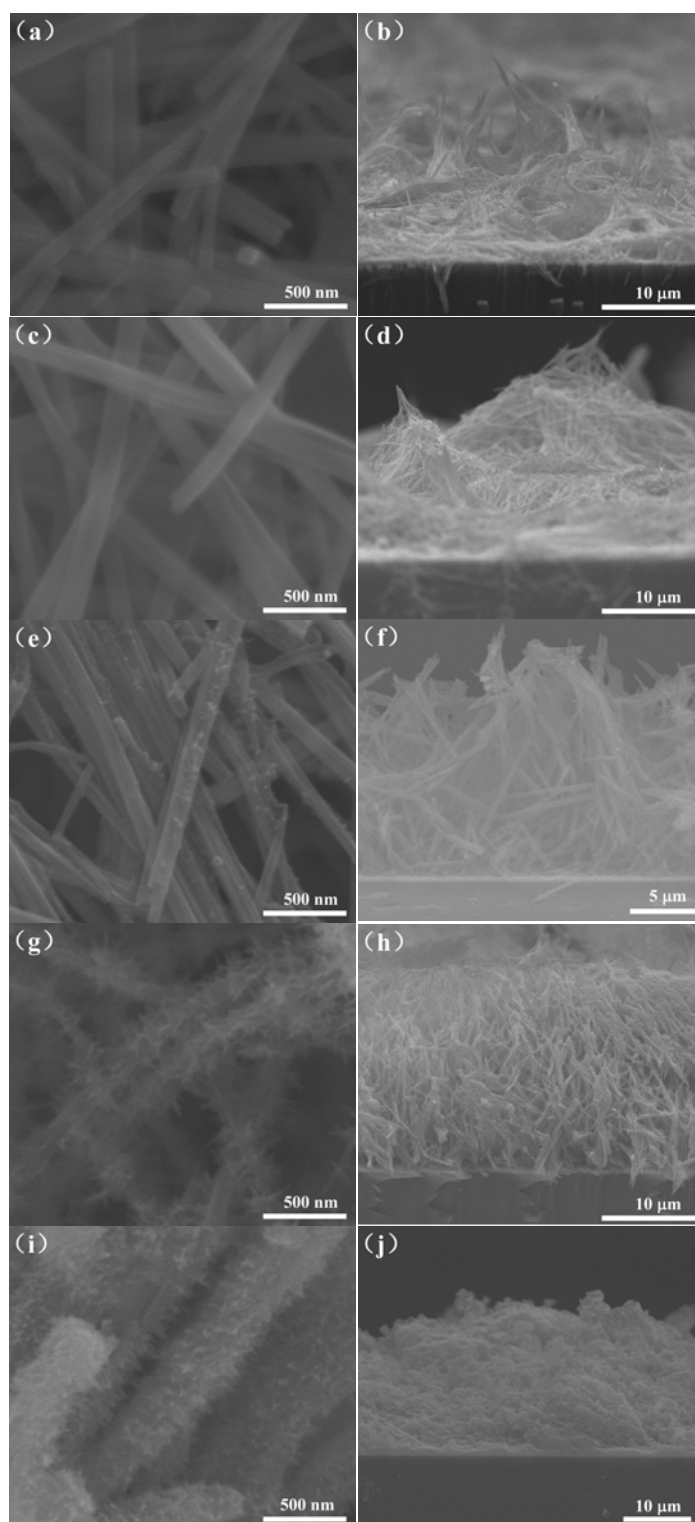

**Supplementary Figure S2. SEM images of evolution process of the hierarchical TiO<sub>2</sub> nanoarrays.** The images shows the as-prepared samples obtained by hydrothermal growth at 180 °C after 1 h (a, b), 2 h (c, d), 3 h (e, f), 6 h (g, h) and 12 h (i, j), respectively, which presents a clear growth process from sparse smooth TiO<sub>2</sub> nanowire to dense hierarchical TiO<sub>2</sub> nanowire with numerous short nano-branches.

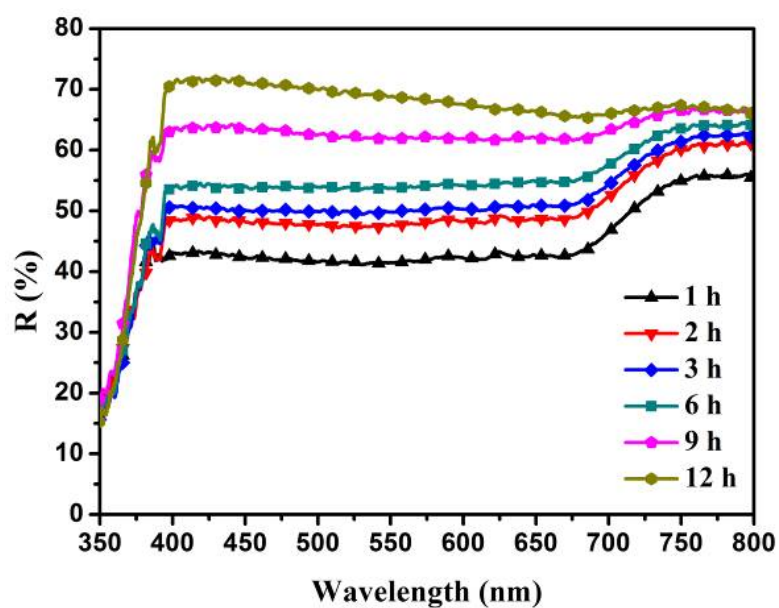

**Supplementary Figure S3. Diffuse reflectance spectra.** The reflectance spectra of the hierarchical TiO<sub>2</sub> nanoarray photoanodes prepared at different hydrothermal reaction time shows the significant improvement of light scattering capabilities for hierarchical TiO<sub>2</sub> nanoarrays photoanode when compared to smooth TiO<sub>2</sub> nanowires. And the light scattering capabilities of as-prepared samples increase along with the reaction time, which would be beneficial to facilitate the light-harvesting efficiency.
